# Supplementary material for: Focus on Chronic Exposure for Deriving Drinking Water Guidance Underestimates Potential Risk to Infants
Source: Int J Environ Res Public Health. 2018 Mar 14;15(3):512. doi: 10.3390/ijerph15030512 (PMC5877057; doi:10.3390/ijerph15030512)
Supplement: Supplementary file 1 [file ijerph-15-00512-s001.xlsx]

## Sheet: SupplementalTable1
Supplemental Material.
Title: Focus on chronic exposure for deriving water guidance results in underestimation of potential risk to infants.
Author: Helen Goeden
Table S1. Reference Dose Derivation Information for 63 MDH Chemical Assessments (2007 - 2017) with Short-term, Subchronic, and Chronic Values.
Lowest value(s) =
		Additional chemicals with only one or two duration values can be found at:	http://www.health.state.mn.us/divs/eh/risk/guidance/gw/table.html
Chemical Name	CAS Number	Reference Dose Derivation Information1
		Short-term			Subchronic			Chronic				Short-term: Chronic Ratio		Subchronic: Chronic Ratio
		Critical Effect(s) [Study Type]2	RfD mg/kg-d	RfD Comment	Critical Effect(s) [Study Type]1	RfD mg/kg-d	RfD Comment	Critical Effect(s) [Study Type]1	RfD mg/kg-d	RfD Comment
1,1,2-Tricloroethylene (TCE)3	79-01-6	Developmental, Immunotoxicity [3 wk time point of Developmental immune study]	0.00052		Developmental, Immunotoxicity [8 wk time point of Developmental immune study]	0.00017		Developmental, Immunotoxicity [8 wk time point of Developmental immune study]	0.00017	Set to subchronic developmental immune based RfD.		3.05882	1.11803	1	0
1,1-Dichloroethane	75-34-3	↓Adult BW, Neurotoxicity [13 wk study w/4 wk assess]	0.6		↓Adult BW, Neurotoxicity [13 wk study]	0.6		↓Adult BW, Neurotoxicity [13 wk study]	0.18	S-to-C UF 3		3.33333	1.20397	3.33333	1.20397
1,2,3-Trichloropropane3,4	96-18-4	Developmental [Continuous breeding study]	0.0042		Hepatotoxicity [17 wk study]	0.004		Hepatotoxicity [2 yr study]	0.0026			1.61538	0.479573	1.53846	0.430783
1,2,4- and 1,3,5-Trichlorobenzene3	120-82-1 and 108-70-3	Hematologic toxicity, Hepatotoxicity [Develop study - maternal effects]	0.17		Adrenal [2 gen study]	0.07		Adrenal [2 gen study]	0.021	S-to-C UF 3		8.09524	2.09128	3.33333	1.20397
1,2,4- and 1,3,5-Trimethylbenzene	95-63-6 and 108-67-8	↓Adult BW, hepatotoxicity [90 day w/30 day assess]	0.14		↓Adult BW, Hepatotoxicity, Renal toxicity [90 day study]	0.14		↓Adult BW, Hepatotoxicity, Renal toxicity [90 day study]	0.048	S-to-C UF 3		2.91667	1.07044	2.91667	1.07044
1,2-Dichoroethane3	107-06-2	Hepatotoxicity [10 day study]	0.23		Renal toxicity [13 wk study]	0.12		Renal toxicity [13 wk study]	0.012	S-to-C UF 10		19.1667	2.95317	10	2.30259
17α-Ethinylestradiol	57-63-6	Developmental [GD6-PND90 direct dosing study]	1.7e-07		Male repro [multi-gen & male repro studies]	1.4e-08		Male & female repro [multi-gen]	1.4e-08	2.8E-8 calculated value. Set to lower Subchronic value		12.1429	2.49674	1	0
2,4-Dichlorophenoxyacetic acid (2,4-D)	94-75-7	Maternal & pup thyroid [extend 1 gen]	0.048		Reanl tox [extend 1 gen]	0.017		Renal tox [extend 1 gen]	0.017	Same as Subchronic - no S-to-C UF applied		2.82353	1.03799	1	0
4-tert-Octylphenol	140-66-9	Developmental [2 gen study]	0.17		Developmental, Female repro system [2 gen study]	0.17		Developmental, Female repro system [2 gen study]	0.051	S-to-C UF 3		3.33333	1.20397	3.33333	1.20397
6-Acetyl-1,1,2,4,4,7-hexamethyltetraline (AHTN or Tonalide)	21145-77-7 or 1506-02-1	Hepatotoxicity [14 day study]	0.07		Hepatotoxicity [13 wk study]	0.011		Hepatotoxicity [13 wk study]	0.0037	S-to-C UF 3		18.9189	2.94016	2.97297	1.08956
Acetaminophen	103-90-2	Hepatotoxicity [Minimal therapeutic dose]	0.25		Hepatotoxicity [Minimal therapeutic dose]	0.28		Hepatotoxicity [Minimal therapeutic dose]	0.093	S-to-C UF 3		2.68817	0.988861	3.01075	1.10219
Acetochlor	34256-82-1	Developmental [2 gen study]	0.016		Hepatotoxicity, Renal toxicity, Male reproductive system, Nervous system [1 yr study]	0.012		Hepatotoxicity, Renal toxicity, Male reproductive system, Nervous system [1 yr study]	0.0039	S-to-C UF 10		4.10256	1.41161	3.07692	1.12393
Acetochlor ESA	187022-11-3	Thyroid [28 day study]	0.29		↓Adult BW & BW gain [13 wk study]	0.19		↓Adult BW & BW gain [13 wk study]	0.056	S-to-C UF 3		5.17857	1.64453	3.39286	1.22167
Acetochlor OXA	184992-44-4	↓Adult BW gain, Thyroid [28 day study]	0.081		↓Adult BW & BW gain, Thyroid [90 day study]	0.062		↓Adult BW & BW gain, Thyroid [90 day study]	0.019	S-to-C UF 3		4.26316	1.45001	3.26316	1.1827
Acetone	67-64-1	Renal toxicity [14 day study]	3.1		Hematological toxicity, Renal toxicity [13 wk study]	2.1		Hematological toxicity, Renal toxicity [13 wk study]	0.69	S-to-C UF 3		4.49275	1.50247	3.04348	1.113
Acrylamide3, 4	79-06-1	Male reproductive toxicity [Dominant-lethal repro study]	0.01		Nervous system [90 day study]	0.007		Nervous system [2 yr study]	0.0037			2.7027	0.994252	1.89189	0.637577
Alachlor	15972-60-8	Renal toxicity [3 gen study]	0.077		Hematological toxicity [1 yr study]	0.02		Hematological toxicity [1 yr study]	0.002	S-to-C UF 10		38.5	3.65066	10	2.30259
Bentazon4	250257-89-0	Develop [2 gen study]	0.033		Hematological toxicity [1 yr study]	0.02		Thyroid [2 yr dietary study]	0.006			5.5	1.70475	3.33333	1.20397
Benzene3	71-43-2	Hematological toxicity, Immunotoxicity [28 day study]	0.014		Hematological toxicity, Immunotoxicity [Occupational inhalation study]	0.0013		Hematological toxicity, Immunotoxicity [Occupational inhalation study]	0.0013	Same as Subchronic - no S-to-C UF applied		10.7692	2.37669	1	0
Benzo[a]pyrene3	50-32-8	Developmental [DNT study]	0.0002		Renal toxicity [90 day study]	0.0002	Set to develop-based short-term RfD	Renal toxicity [90 day study]	0.0002	Set to short-term developmental-based RfD		1	0	1	0
Bisphenol A	80-05-7	Developmental [GD6-PND90]	0.16	Maternal-based RfD (0.065) < neonatal-based RfD (0.16), but neonatal-based HBG < maternal-based HBG so neonatal Rfd listed	Hepatotoxicity [2 gen study]	0.0065		Hepatotoxicity [2 gen study]	0.0065	Same as Subchronic - no S-to-C UF applied		24.6154	3.20337	1	0
Boron	7440-42-8	Developmental [Developmental GD0-20 study]	0.047		Developmental [Developmental GD0-20 study]	0.047	Set to the developmental-based RfD.	Developmental [Developmental GD0-20 study]	0.047	Set to short-term developmental-based RfD		1	0	1	0
Butyl Benzyl Phthalate	85-68-7	Developmental [2 gen study]	0.15		Developmental [2 gen study]	0.15	Set to the developmental-based RfD.	Developmental [2 gen study]	0.15	Set to short-term developmental-based RfD		1	0	1	0
Cadmium4	7440-43-9	Nervous system [Developmental Neurotox]	0.0016		Skeletal [3 month time point in chronic study]	0.00044		Renal toxicity [Epi studies]	0.00011			14.5455	2.67728	4	1.38629
Carbamazepine	298-46-4	Female & male reproductive system, hematological, hepatic, immune, nervous system, and thyroid toxicity [Minimal therapeutic dose]	0.013	Minimal therapeutic dose	Female & male reproductive system, Hematological, Hepatic, Immune, Nervous system, & Thyroid toxicity [Minimal therapeutic dose]	0.013	Minimal therapeutic dose	Female & male reproductive system, Hematological, Hepatic, Immune, Nervous system, & Thyroid toxicity [Minimal therapeutic dose]	0.0057	S-to-C UF 3		2.2807	0.824483	2.2807	0.824483
Carbon Tetrachloride3	56-23-5	Hepatotoxicity [10 day immune study]	0.0037		Hepatoxicity [12 wk study]	0.0098	Higher than short-term RfD due to differences in type of POD (BMDL vs LOAEL)	Hepatoxicity [12 wk study]	0.0033	S-to-C UF 3		1.12121	0.11441	2.9697	1.08846
Chloroform4 (also used for Dichlorofluoromethane)	67-66-3	Immunotoxicity [90 day study w/14 day immune assess]	0.022		Immunotoxicity [90 day study]	0.022	Same study as short-term	Hepatotoxicity [7.5 yr study]	0.02			1.1	0.0953102	1.1	0.0953102
Chlorpyrifos	2921-88-2	Nervous system [Developmental Neurotox]	0.0009	Maternal-based RfD (0.00023) < neonatal-based RfD (0.0009), but neonatal-based HBG<maternal HBG. So neonatal-based RfD listed.	Nervous system [2 generation study - maternal effects]	0.00023	Set to maternal-based short term RfD	Nervous system [2 generation study - maternal effects]	0.00023	Set to maternal-based short-term RfD		3.91304	1.36432	1	0
Chlorpyrifos Oxon	5598-15-2	Nervous system [11 day oral study in pups]	8e-05	Maternal-based RfD (0.00008) < neonatal-based RfD (0.00024), & maternal-based HBG was lowest value	Nervous system [11 day oral study in pups]	8e-05	Set to maternal-based short term RfD	Nervous system [11 day oral study in pups - maternal effects]	8e-05	Set to maternal-based short-term RfD		1	0	1	0
Clothianidin4	210880-92-5 205510-53-8	Develop [2 gen study]	0.093		Develop [2 gen study]	0.093	set to short-term develop based RfD	Ovarian hyperplasia [2 yr study]	0.077			1.20779	0.188794	1.20779	0.188794
Cyanazine4	21725-46-2	Developmental, Female reproductive system [Develop study]	0.0015		Hepatic and renal toxicity [1 yr study]	0.0012		↓Adult BW & BW gain [2 yr study]	0.00022			6.81818	1.91959	5.45455	1.69645
Desvenlafaxine	93413-62-8	GI, male reproductive system, nervous sytem [Minimal therapeutic dose]	0.0071	Set to minimal therapeutic dose	GI, male reproductive system, nervous sytem [Minimal therapeutic dose]	0.0071	Set to minimal therapeutic dose	GI, male reproductive system, nervous sytem [Minimal therapeutic dose]	0.0071	Set to minimal therapeutic dose		1	0	1	0
Dibutyl Phthalate	84-74-2	Developmental [Develop steroidogenesis study]	0.023		Developmental [Develop steroidogenesis study]	0.023	Set to the developmental-based RfD. Subchronic study-based RfD = 0.83.	Developmental [Develop steroidogenesis study]	0.023	Set to short-term developmental-based RfD		1	0	1	0
cis-1,2-Dichloroethene	156-59-2	Hepatotoxicity [14 day study]	0.033		Renal toxicity [90 day study]	0.0043		Renal toxicity [90 day study]	0.0013	S-to-C UF 3		25.3846	3.23414	3.30769	1.19625
Dieldrin3,4	60-57-1	Neurotoxicity [55 day study w/15 day assess]	0.00011		Neurotoxicity [55 day study]	9e-05		Hepatotoxicity [2 yr study]	4.3e-05			2.55814	0.93928	2.09302	0.73861
Di-(2-ethylhexyl) phthalate (DEHP)3	117-81-7	Developmental, Male Reproductive system [3 gen study]	0.029		Developmental, Male Reproductive system [3 gen study]	0.029	Same basis as short-term.	Developmental, Male Reproductive system [3 gen study]	0.029	Set to short-term developmental-based RfD		1	0	1	0
N,N-Diethyl-meta-toluamide (DEET)4	134-62-3	Developmental [2 gen study]	0.23		↓Adult BW [90 day study]	0.12		Neurotoxicity [2 gen study]	0.23	Higher than subchronic RfD due to closer dose spacing of NOAEL/LOAEL		1	0	0.521739	-0.650588
Dimethenamid and Dimethenamid P4	87674-68-8 & 163515-14-8	Hepatotoxicity [4 wk study]	0.34		Hepatotoxicity [13 wk study]	0.27		Hepatotoxicity [2 yr study]	0.06			5.66667	1.7346	4.5	1.50408
Dinoseb	88-85-7	Developmental [Developmental study]	0.0048		Developmental [Developmental study]	0.0048	set to short-term develop based RfD	Male reproductive toxicity [11 week study]	0.003	S-to-C UF 3		1.6	0.470004	1.6	0.470004
Ethylbenzene	100-41-4	Hepatotoxicity, renal toxicity [4 wk study]	0.075		Hepatotoxicity [13 wk study]	0.048		Hepatotoxicity [13 wk study]	0.016	S-to-C UF 3		4.6875	1.5449	3	1.09861
Ethylene Glycol	107-21-1	Developmental [Develop study]	0.33		↓Adult BW, Renal toxicity [16 wk study]	0.33	set to short-term develop based RfD	↓Adult BW,Renal toxicity [1 yr study]	0.33	set to short-term develop based RfD		1	0	1	0
s-Ethyl-N, N-dipropylthiocarbamate (EPTC)4	759-94-4	Developmental, nervous system [Neurodevelop study}	0.16		Cardovascular system [2 gen study]	0.033		Cardiovascular system [2 yr study]	0.0083			19.2771	2.95892	3.9759	1.38025
Glyphosate4	1071-83-6, 38641-94-0, 40465-76-7, 34494-04-7, 114370-14-8, 39600-42-5	Developmental [2 gen study]	2		Salivary gland effects [2 gen study]	0.41		Salivary gland [2 yr study]	0.12			16.6667	2.81341	3.41667	1.22867
Mestranol (based on 17α-Ethinylestradiol adjusted for bioequivalency)	72-33-3	Developmental [GD6-PND90 direct dosing study]	2.4e-07		Male repro [multi-gen & male repro studies]	2e-08		Male & female repro [multi-gen]	2e-08	4E-8 calculated value. Set to lower Subchronic value		12	2.48491	1	0
Methyl tert-butyl ether3,4	1634-04-4	Kidney [28 day study]	0.42		Renal [13 wk study]	0.17		Renal [2 yr study]	0.14			3	1.09861	1.21429	0.194156
Metolachlor and S-Metolachlor	51218-45-2 and 87392-12-9	Developmental [2 gen study]	0.24		↓Adult BW [1 yr dog study]	0.097		↓Adult BW [1 yr dog study]	0.097	Same as Subchronic - no S-to-C UF applied		2.47423	0.905928	1	0
Metolachlor OXA	152019-73-3	Nonspecific blood chemistry changes [13 wk study w/4 wk assess]	1.7		Nonspecific blood chemistry changes [13 wk study]	1.7		Nonspecific blood chemistry changes [13 wk study]	0.17	S-to-C UF 10		10	2.30259	10	2.30259
Metribuzin (and degradates DA, DK, DADK)4	21087-64-9	Thyroid [9 wk thyroid mech study w/7 & 21 day assess]	0.006		Thyroid [9 wk thyroid mech study]	0.006		Thyroid [2 yr dietary study]	0.0035			1.71429	0.538997	1.71429	0.538997
Microcystin	77238-39-2 or 101043-37-2	Hepatotoxicity [28 day study]	4e-05		Hepatotoxicity [13 wk study]	2.3e-05		Hepatotoxicity [13 wk study]	6.8e-06	S-to-C UF 3		5.88235	1.77196	3.38235	1.21857
Naphthalene	91-20-3	Neurotoxicity (maternal) [Develop study]	0.038		↓Adult BW [13 wk study]	0.052	Short-term lower but due to different POD (LOAEL) vs NOAEL for Subchr	↓Adult BW [13 wk study]	0.016	S-to-C UF 3		2.375	0.864997	3.25	1.17865
Nonylphenol	84852-15-3	Development [3 gen study]	0.21		Renal [3 gen study]	0.016		Renal [3 gen study]	0.0049	S-to-C UF 3		42.8571	3.75787	3.26531	1.18335
Pentachlorophenol3	87-86-5	Developmental [Develop study]	0.004		Hepatoxicity, Thyroid [1 yr study]	0.0031		Hepatoxicity, Thyroid [1 yr study]	0.0031	Same as Subchronic - no S-to-C UF applied		1.29032	0.254892	1	0
PFBA	375-22-4	Hepatotoxicity [28 day study]	0.0038		Hepatoxicity, Hematological toxicity, Thyroid [90 day study]	0.0029		Hepatoxicity, Hematological toxicity, Thyroid [90 day study]	0.0029	Same as Subchronic - no S-to-C UF applied		1.31034	0.27029	1	0
PFBS	375-73-5	Developmental [Developmental GD0-20 study]	0.0016		Renal toxicity [2 gen study]	0.0013		Renal toxicity [2 gen study]	0.00043	S-to-C UF 3		3.72093	1.31397	3.02326	1.10633
Pyraclostrobin4	175013-18-0	Developmental [2 gen study]	0.057		↓Adult BW &BW gain, Gastrointestinal system, Immunotoxicity [3 mon study]	0.046		↓Adult BW &BW gain, Gastrointestinal system, Immunotoxicity [2 yr study]	0.033			1.72727	0.546544	1.39394	0.332134
Sulfamethazine (and Sulfamethoxazole)4	57-68-1 (723-46-6)	Thyroid [4 wk dietary study]	0.04		Thyroid [13 wk timepoint from 2 yr dietary study]	0.017		Thyroid [2 yr dietary study]	0.019	Slightly >Subchr RfD but from same study. Due to difference in subchr vs chronic intake & HED calc		2.10526	0.74444	0.894737	-0.111226
Tetrahydrofuran	109-99-9	Developmental [2 gen study]	0.82		Developmental [2 gen study]	0.82	Calc value 1.7 mg/kg-d set to short-term develop based RfD	Renal toxicity [2 gen study]	0.57	S-to-C UF 3		1.4386	0.363668	1.4386	0.363668
Thiamethoxam	153719-23-4	Developmental [develop study]	0.25		Male Repro tox [1 yr dog study]	0.057		2 yr study in rats - but final RfD set to Subchr	0.057	Calculated chronic 0.43 mg/kg-d was higher. Set to Subchr value		4.38596	1.47841	1	0
Toluene	108-88-3	Immunotoxicity [4 wk immune study]	0.22		Hepatoxicity, Renal toxicity [13 wk study]	0.24		Hepatoxicity, Renal toxicity [13 wk study]	0.079	S-to-C UF 3		2.78481	1.02418	3.03797	1.11119
Triclosan4	3380-34-5	Thyroid [30 day puberty/thyroid study]	0.067		Hepatotoxicity [13 wk study]	0.033		Hematological toxicity, hepatotoxicity [18 mon yr study]	0.047	Higher than subchronic LOAEL-based RfD due to dose selection. Chronic RfD based on NOAEL.		1.42553	0.354545	0.702128	-0.35364
Tris (2-chloroethyl) phosphate (TCEP)3,4	115-96-8	Neurotoxicity, renal toxicity 16 day study]	0.15		Renal toxicity [16-18 wk study]	0.068		Renal toxicity [2 yr study]	0.067			2.23881	0.805943	1.01493	0.0148151
Venlafaxine	93413-69-5	GI, male reproductive, nervous sytem [Minimal therapeutic dose]	0.0054	Minimal therapeutic dose	GI, male reproductive, nervous sytem [Minimal therapeutic dose]	0.0054	Minimal therapeutic dose	GI, male reproductive, nervous sytem [Minimal therapeutic dose]	0.0054	Minimal therapeutic dose		1	0	1	0
Xylenes4	1330-20-7	↓Adult BW [14 day study]	0.5		Renal toxicity [90 day study]	0.15	NOAEL/LOAEL of 150/750 mg/kg-d	↓Adult BW [2 yr study]	0.18	Higher than subchronic due to study dose selection. NOAEL/LOAEL of 179/357 mg/kg-d		2.77778	1.02165	0.833333	-0.182322
NA - Not Applicable			63			63			63
ND - Not Derived
1More detailed summary of the RfD derivation for each chemicals can be found on MDH's web site : http://www.health.state.mn.us/divs/eh/risk/guidance/gw/table.html											N=	63	63	63	63
2 Study type oral unless otherwise noted											Min	1		0.521739
3 Chemical also evaluated as a linear carcinogen											Max	42.8571		10
4 Chronic RfD based on chronic laboratory animal study, except cadmium, which is based on a chronic epidemiology study.											Average	6.35798		2.4291
											STDEV	8.64171		2.07038
											GeoMean	3.46585		1.87302
											STDEV of log values	1.04109	1.04109	0.696937	0.696937
											GeoSD	2.83229		2.00759
											50th%	2.82353		1.6
										75th%		5.77451		3.26423
											90th%	18.4685		3.86406
											95th%	24.0816		5.35909

## Sheet: SupplementalTable2
Supplemental Material.
Title: Focus on chronic exposure for deriving water guidance results in underestimation of potential risk to infants.
Author: Helen Goeden
Table S2. Health-based Guidance (2007 - 2017) Derivation Information
Lowest value(s) =
Chemical Name	CAS Number	Duration Specific Drinking Water Guidance Value (μgL)1
		Calculated/Final Short-term Value μg/L	Short-term Value Comment	Calculated Subchronic Value μg/L	Final Subchronic Value ug/L	Calculated Chronic Value ug/L	Final Chronic Value μg/L		Short-term: Calculated Chronic Ratio	log	Calculated Subchronic: Calculated Chronic Ratio	log
Highly Volatile (default RSC for all durations 0.2)
Benzene1	71-43-2	10		3	3	6	3		1.66667	0.510826	0.5	-0.693147
Carbon Tetrachloride1	56-23-5	3		30	3	20	3		0.15	-1.89712	1.5	0.405465
Chloroform (also used for Dichlorofluoromethane)	67-66-3	20		60	20	90	20		0.222222	-1.50408	0.666667	-0.405465
1,1-Dichloroethane5	75-34-3	400		2000	400	80	80		5	1.60944	25	3.21888
1,2-Dichoroethane1	107-06-2	200		300	200	60	60		3.33333	1.20397	5	1.60944
cis-1,2-Dichloroethene	156-59-2	20		10	10	6	6		3.33333	1.20397	1.66667	0.510826
Ethylbenzene	100-41-4	50		100	50	70	50		0.714286	-0.336472	1.42857	0.356675
Toluene	108-88-3	200		600	200	400	200		0.5	-0.693147	1.5	0.405465
1,2,4- and 1,3,5-Trichlorobenzene1	120-82-1 and 108-70-3	100		200	100	100	100		1	0	2	0.693147
1,1,2-Tricloroethylene (TCE)1	79-01-6	0.4		0.4	0.4	0.8	0.4		0.5	-0.693147	0.5	-0.693147
1,2,4- and 1,3,5-Trimethylbenzene	95-63-6 and 108-67-8	100		400	100	200	100		0.5	-0.693147	2	0.693147
Xylenes	1330-20-7	300		400	300	800	300		0.375	-0.980829	0.5	-0.693147
Not Highly Volatile (default RSC: short-term 0.5; subchronic & chronic 0.2)
Acetaminophen2	103-90-2	200		700	200	400	200		0.5	-0.693147	1.75	0.559616
Acetochlor	34256-82-1	30		30	30	20	20		1.5	0.405465	1.5	0.405465
Acetachlor ESA	187022-11-3	500		500	500	300	300		1.66667	0.510826	1.66667	0.510826
Acetachlor OXA	184992-44-4	100		200	100	90	90		1.11111	0.105361	2.22222	0.798508
Acetone	67-64-1	5000		6000	5000	3000	3000		1.66667	0.510826	2	0.693147
AHTN	21145-77-7 or 1506-02-1	100		30	30	20	20		5	1.60944	1.5	0.405465
Acrylamide2	79-06-1	7		20	7	20	7		0.35	-1.04982	1	0
Alachlor	15972-60-8	100		60	60	9	9		11.1111	2.40795	6.66667	1.89712
Bentazon	250257-89-0	60		50	50	30	30		2	0.693147	1.66667	0.510826
Benzo[a]pyrene1	50-32-8	0.3		0.5	0.3	0.9	0.3		0.333333	-1.09861	0.555556	-0.587787
Bisphenol A2	80-05-7	100	Maternal-based RfD < neonatal-based RfD, but neonatal-based HBG was lower.	20	20	30	20		3.33333	1.20397	0.666667	-0.405465
Boron4	7440-42-8	500		800	500	600	500		0.833333	-0.182322	1.33333	0.287682
Butyl Benzyl Phthalate2	85-68-7	100		400	100	700	100		0.142857	-1.94591	0.571429	-0.559616
Cadmium	7440-43-9	1		1	1	0.5	0.5		2	0.693147	2	0.693147
Carbamazepine3	298-46-4	40		100	40	100	40		0.4	-0.916291	1	0
Chlorpyrifos2	2921-88-2	0.6	Maternal-based RfD < neonatal-based RfD, but neonatal-based HBG was lower.	1	0.6	1	0.6		0.6	-0.510826	1	0
Chlorpyrifos Oxon4	5598-15-2	0.4	Maternal-based RfD < neonatal-based RfD, but neonatal-based HBG was lower.	0.6	0.4	1	0.4		0.4	-0.916291	0.6	-0.510826
Clothianidin	210880-92-5 205510-53-8	200		300	200	400	200		0.5	-0.693147	0.75	-0.287682
Cyanazine	21725-46-2	3		3	3	1	1		3	1.09861	3	1.09861
Desvenlafaxine3	93413-62-8	20		70	20	100	20		0.2	-1.60944	0.7	-0.356675
Dibutyl Phthalate2	84-74-2	20		60	20	100	20		0.2	-1.60944	0.6	-0.510826
2,4-Dichlorophenoxyacetic acid (2,4-D)	94-75-7	30		50	30	80	30		0.375	-0.980829	0.625	-0.470004
Dieldrin1	60-57-1	0.2		0.3	0.2	0.2	0.2		1	0	1.5	0.405465
Di-(2-ethylhexyl) phthalate (DEHP)1,2	117-81-7	20		80	20	100	20		0.2	-1.60944	0.8	-0.223144
N,N-Diethyl-meta-toluamide (DEET)2	134-62-3	200		300	200	1000	200		0.2	-1.60944	0.3	-1.20397
Dimethenamid and Dimethenamid P	87674-68-8 & 163515-14-8	600		700	600	300	300		2	0.693147	2.33333	0.847298
Dinoseb	88-85-7	8		10	8	10	8		0.8	-0.223144	1	0
17α-Ethinylestradiol	57-63-6	0.0005		0.0002	0.0002	0.0003	0.0002		1.66667	0.510826	0.666667	-0.405465
s-Ethyl-N, N-dipropylthiocarbamate (EPTC)	759-94-4	300		90	90	40	40		7.5	2.0149	2.25	0.81093
Ethylene Glycol4	107-21-1	2000	All durations based on maternal intake rate.	2000	2000	2000	2000		1	0	1	0
Glyphosate	1071-83-6, 38641-94-0, 40465-76-7, 34494-04-7, 114370-14-8, 39600-42-5	1000		1000	1000	500	500		2	0.693147	2	0.693147
Mestranol (based on 17α-Ethinylestradiol adjusted for bioequivalency)	72-33-3	0.0007		0.0002	0.0002	0.0004	0.0002		1.75	0.559616	0.5	-0.693147
Methyl tert-butyl ether1	1634-04-4	700		1000	700	2000	700		0.35	-1.04982	0.5	-0.693147
Metolachlor and S-Metolachlor2	51218-45-2 and 87392-12-9	400		300	300	500	300		0.8	-0.223144	0.6	-0.510826
Metolachlor OXA	152019-73-3	3000		4000	3000	800	800		3.75	1.32176	5	1.60944
Metribuzin (and degradates DA, DK, DADK)	21087-64-9	10		20	10	20	10		0.5	-0.693147	1	0
Microcystin3	77238-39-2 or 101043-37-2	0.1		0.2	0.1	0.1	0.1		1	0	2	0.693147
Naphthalene	91-20-3	70		100	70	70	70		1	0	1.42857	0.356675
Nonylphenol2	84852-15-3	100		40	40	20	20		5	1.60944	2	0.693147
4-tert-Octylphenol2	140-66-9	100		400	100	200	100		0.5	-0.693147	2	0.693147
Pentachlorophenol1	87-86-5	7		8	7	10	7		0.7	-0.356675	0.8	-0.223144
PFBA	375-22-4	7		8	7	10	7		0.7	-0.356675	0.8	-0.223144
PFBS	375-73-5	3		4	3	2	2		1.5	0.405465	2	0.693147
Pyraclostrobin	175013-18-0	100		100	100	200	100		0.5	-0.693147	0.5	-0.693147
Sulfamethazine (and Sulfamethoxazole)	57-68-1 (723-46-6)	100		200	100	400	100		0.25	-1.38629	0.5	-0.693147
Tetrahydrofuran	109-99-9	600		2000	600	3000	600		0.2	-1.60944	0.666667	-0.405465
Thiamethoxam	153719-23-4	400		200	200	300	200		1.33333	0.287682	0.666667
1,2,3-Trichloropropane1	96-18-4	7		10	7	10	7		0.7	-0.356675	1	0
Triclosan2	3380-34-5	50		90	50	200	50		0.25	-1.38629	0.45	-0.798508
Tris (2-chloroethyl) phosphate (TCEP)1	115-96-8	300		200	200	300	200		1	0	0.666667	-0.405465
Venlafaxine3	93413-69-5	10		60	10	100	10		0.1	-2.30259	0.6	-0.510826
NA - Not Applicable									63		63		=N
ND - Not Derived									0.1		0.3		Min
1Table contains only noncancer-based guidance values. For linear carcinogens cancer-based guidance values and a more detailed summary of the HBG derivation for each chemical see MDH’s web site at: http://www.health.state.mn.us/divs/eh/risk/guidance/gw/table.html									11.1111		25		Max
2Given significant potential non-water sources of exposure for infants and children an RSC of 0.2 was selected rather than the default of 0.5.									1.47251		1.76452		Average
3Water is likely to be the predominant source of exposure therefore an RSC of 0.8 was selected for all durations rather than the default of 0.5 (short-term) and 0.2 (subchronic and chronic)									1.90875		3.18613		STDEV
4Short-term value was based on maternal intake not infants intake. Ethylene glycol - critical effect occurs only in utero. Chlorpyrifos oxon - pregnancy state sensitivity.									0.830641		1.15333		GeoMean
51,1-Dichloroethane - chronic guidance value includes an additional Group C adjustment factor of 10									1.06222	1.06222	0.768992	0.768992	STDEV of log values
									2.89279		2.15759		GeoSD
									0.8		1		50th%
									3.33333		2.24444		90th%
									5		4.8		95th%

## Sheet: SupplementalTable3
Supplemental Material.
Title: Focus on chronic exposure for deriving water guidance results in underestimation of potential risk to infants.
Author: Helen Goeden
Table S3. Health-based Guidance (2007 - 2017) Derivation Information - RSC removed from Less Than Chronic Values
Chemical Name	CAS Number	Short-term		Subchronic		Chronic				No RSC Short-term:Chronic w/RSC 0.2	0.8 RSC Short-term:0.2 Chronic	No RSC Short-term:No RSC Chronic	No RSC Subchronic: Chronic w/RSC 0.2	No RSC Subchronic:No RSC Chronic
		RfD mg/kg-d	HBG (no RSC) ug/L	RfD mg/kg-d	HBG (no RSC) ug/L	RfD mg/kg-d	HBG (RSC=0.2) ug/L	HBG (no RSC) ug/L
Acetaminophen	103-90-2	0.25	877.193	0.28	4000	0.093	422.727	2113.64		2.07508	1.66006	0.415016	9.46237	1.89247
Acetochlor	34256-82-1	0.016	56.1404	0.012	171.429	0.0039	17.7273	88.6364		3.16689	2.53351	0.633378	9.67033	1.93407
Acetachlor ESA	187022-11-3	0.29	1017.54	0.19	2714.29	0.056	254.545	1272.73		3.99749	3.19799	0.799499	10.6633	2.13265
Acetachlor OXA	184992-44-4	0.081	284.211	0.062	885.714	0.019	86.3636	431.818		3.29086	2.63269	0.658172	10.2556	2.05113
Acetone	67-64-1	3.1	10877.2	2.1	30000	0.69	3136.36	15681.8		3.46809	2.77447	0.693618	9.56522	1.91304
6-Acetyl-1,1,2,4,4,7-hexamethyltetraline (AHTN or Tonalide)	21145-77-7 or 1506-02-1	0.07	245.614	0.011	157.143	0.0037	16.8182	84.0909		14.6041	11.6833	2.92082	9.34363	1.86873
Acrylamide3, 4	79-06-1	0.01	35.0877	0.007	100	0.0037	16.8182	84.0909		2.0863	1.66904	0.417259	5.94595	1.18919
Alachlor	15972-60-8	0.077	270.175	0.02	285.714	0.002	9.09091	45.4545		29.7193	23.7754	5.94386	31.4286	6.28571
Bentazon4	250257-89-0	0.033	115.789	0.02	285.714	0.006	27.2727	136.364		4.24561	3.39649	0.849123	10.4762	2.09524
Benzene3	71-43-2	0.014	49.1228	0.0013	18.5714	0.0013	5.90909	29.5455		8.31309	6.65047	1.66262	3.14286	0.628571
Benzo[a]pyrene3	50-32-8	0.0002	0.701754	0.0002	2.85714	0.0002	0.909091	4.54545		0.77193	0.617544	0.154386	3.14286	0.628571
Bisphenol A	80-05-7	0.16	561.404	0.0065	92.8571	0.0065	29.5455	147.727		19.0013	15.2011	3.80027	3.14286	0.628571
Boron (all values based on maternal intake rate)	7440-42-8	0.047	164.912	0.047	671.429	0.047	213.636	1068.18		0.77193	0.617544	0.154386	3.14286	0.628571
Butyl Benzyl Phthalate	85-68-7	0.15	526.316	0.15	2142.86	0.15	681.818	3409.09		0.77193	0.617544	0.154386	3.14286	0.628571
Cadmium4	7440-43-9	0.0016	5.61404	0.00044	6.28571	0.00011	0.5	2.5		11.2281	8.98246	2.24561	12.5714	2.51429
Carbamazepine	298-46-4	0.013	45.614	0.013	185.714	0.0057	25.9091	129.545		1.76054	1.40843	0.352108	7.16792	1.43358
Carbon Tetrachloride3	56-23-5	0.0037	12.9825	0.0098	140	0.0033	15	75		0.865497	0.692398	0.173099	9.33333	1.86667
Chloroform4 (also used for Dichlorofluoromethane)	67-66-3	0.022	77.193	0.022	314.286	0.02	90.9091	454.545		0.849123	0.679298	0.169825	3.45714	0.691429
Chlorpyrifos	2921-88-2	0.0009	3.15789	0.00023	3.28571	0.00023	1.04545	5.22727		3.02059	2.41648	0.604119	3.14286	0.628571
Chlorpyrifos Oxon	5598-15-2	0.00024	0.842105	8e-05	1.14286	8e-05	0.363636	1.81818		2.31579	1.85263	0.463158	3.14286	0.628571
Clothianidin	210880-92-5 205510-53-8	0.093	326.316	0.093	1328.57	0.077	350	1750		0.932331	0.745865	0.186466	3.79592	0.759184
Cyanazine4	21725-46-2	0.0015	5.26316	0.0012	17.1429	0.00022	1	5		5.26316	4.21053	1.05263	17.1429	3.42857
Desvenlafaxine	93413-62-8	0.0071	24.9123	0.0071	101.429	0.0071	32.2727	161.364		0.77193	0.617544	0.154386	3.14286	0.628571
Dibutyl Phthalate	84-74-2	0.023	80.7018	0.023	328.571	0.023	104.545	522.727		0.77193	0.617544	0.154386	3.14286	0.628571
1,1-Dichloroethane	75-34-3	0.6	2105.26	0.6	8571.43	0.18	818.182	4090.91		2.5731	2.05848	0.51462	10.4762	2.09524
1,2-Dichoroethane3	107-06-2	0.23	807.018	0.12	1714.29	0.012	54.5455	272.727		14.7953	11.8363	2.95906	31.4286	6.28571
cis-1,2-Dichloroethene	156-59-2	0.033	115.789	0.0043	61.4286	0.0013	5.90909	29.5455		19.5951	15.6761	3.91903	10.3956	2.07912
2,4-Dichlorophenoxyacetic acid (2,4-D)	94-75-7	0.048	168.421	0.017	242.857	0.017	77.2727	386.364		2.17957	1.74365	0.435913	3.14286	0.628571
Dieldrin3,4	60-57-1	0.00011	0.385965	9e-05	1.28571	4.3e-05	0.195455	0.977273		1.9747	1.57976	0.394941	6.57807	1.31561
Di-(2-ethylhexyl) phthalate (DEHP)3	117-81-7	0.029	101.754	0.029	414.286	0.029	131.818	659.091		0.77193	0.617544	0.154386	3.14286	0.628571
N,N-Diethyl-meta-toluamide (DEET)4	134-62-3	0.23	807.018	0.12	1714.29	0.23	1045.45	5227.27		0.77193	0.617544	0.154386	1.63975	0.32795
Dimethenamid and Dimethenamid P4	87674-68-8 & 163515-14-8	0.34	1192.98	0.27	3857.14	0.06	272.727	1363.64		4.37427	3.49942	0.874854	14.1429	2.82857
Dinoseb	88-85-7	0.0048	16.8421	0.0048	68.5714	0.003	13.6364	68.1818		1.23509	0.98807	0.247018	5.02857	1.00571
17α-Ethinylestradiol	57-63-6	1.7e-07	0.000596491	1.4e-08	0.0002	1.4e-08	6.36364e-05	0.000318182		9.37343	7.49875	1.87469	3.14286	0.628571
Ethylbenzene	100-41-4	0.075	263.158	0.048	685.714	0.016	72.7273	363.636		3.61842	2.89474	0.723684	9.42857	1.88571
s-Ethyl-N, N-dipropylthiocarbamate (EPTC)	759-94-4	0.16	561.404	0.033	471.429	0.0083	37.7273	188.636		14.8806	11.9045	2.97611	12.4957	2.49914
Ethylene Glycol (all values based on maternal intake rate)	107-21-1	0.33	1157.89	0.33	4714.29	0.33	1500	7500		0.77193	0.617544	0.154386	3.14286	0.628571
Glyphosate	1071-83-6, 38641-94-0, 40465-76-7, 34494-04-7, 114370-14-8, 39600-42-5	2	7017.54	0.41	5857.14	0.12	545.455	2727.27		12.8655	10.2924	2.5731	10.7381	2.14762
Mestranol (based on 17α-Ethinylestradiol adjusted for bioequivalency)	72-33-3	2.4e-07	0.000842105	2e-08	0.000285714	2e-08	9.09091e-05	0.000454545		9.26316	7.41053	1.85263	3.14286	0.628571
Methyl tert-butyl ether3,4	1634-04-4	0.42	1473.68	0.17	2428.57	0.14	636.364	3181.82		2.31579	1.85263	0.463158	3.81633	0.763265
Metolachlor & S-Metolachlor	51218-45-2 and 87392-12-9	0.24	842.105	0.097	1385.71	0.097	440.909	2204.55		1.90993	1.52794	0.381986	3.14286	0.628571
Metolachlor OXA	152019-73-3	1.7	5964.91	1.7	24285.7	0.17	772.727	3863.64		7.7193	6.17544	1.54386	31.4286	6.28571
Metribuzin (& degradates DA, DK, DADK)4	21087-64-9	0.006	21.0526	0.006	85.7143	0.0035	15.9091	79.5455		1.32331	1.05865	0.264662	5.38776	1.07755
Microcystin	77238-39-2 or 101043-37-2	4e-05	0.140351	2.3e-05	0.328571	6.8e-06	0.0309091	0.154545		4.54076	3.63261	0.908153	10.6303	2.12605
Naphthalene	91-20-3	0.038	133.333	0.052	742.857	0.016	72.7273	363.636		1.83333	1.46667	0.366667	10.2143	2.04286
Nonylphenol	84852-15-3	0.21	736.842	0.016	228.571	0.0049	22.2727	111.364		33.0827	26.4662	6.61654	10.2624	2.05248
4-tert-Octylphenol;	140-66-9	0.17	596.491	0.17	2428.57	0.051	231.818	1159.09		2.5731	2.05848	0.51462	10.4762	2.09524
Pentachlorophenol3	87-86-5	0.004	14.0351	0.0031	44.2857	0.0031	14.0909	70.4545		0.996038	0.796831	0.199208	3.14286	0.628571
PFBA	375-22-4	0.0038	13.3333	0.0029	41.4286	0.0029	13.1818	65.9091		1.01149	0.809195	0.202299	3.14286	0.628571
PFBS	375-73-5	0.0016	5.61404	0.0013	18.5714	0.00043	1.95455	9.77273		2.8723	2.29784	0.574459	9.50166	1.90033
Pyraclostrobin4	175013-18-0	0.057	200	0.046	657.143	0.033	150	750		1.33333	1.06667	0.266667	4.38095	0.87619
Sulfamethazine (and Sulfamethoxazole)4	57-68-1 (723-46-6)	0.04	140.351	0.017	242.857	0.019	86.3636	431.818		1.62512	1.30009	0.325023	2.81203	0.562406
Tetrahydrofuran	109-99-9	0.82	2877.19	0.82	11714.3	0.57	2590.91	12954.5		1.1105	0.888396	0.222099	4.5213	0.904261
Thiamethoxam	153719-23-4	0.25	877.193	0.057	814.286	0.057	259.091	1295.45		3.38566	2.70853	0.677131	3.14286	0.628571
Toluene	108-88-3	0.22	771.93	0.24	3428.57	0.079	359.091	1795.45		2.14968	1.71974	0.429936	9.54792	1.90958
1,2,4- & 1,3,5-Trichlorobenzene3	120-82-1 and 108-70-3	0.17	596.491	0.07	1000	0.021	95.4545	477.273		6.24896	4.99916	1.24979	10.4762	2.09524
1,1,2-Tricloroethylene (TCE)3	79-01-6	0.00052	1.82456	0.00017	2.42857	0.00017	0.772727	3.86364		2.3612	1.88896	0.472239	3.14286	0.628571
1,2,3-Trichloropropane3,4	96-18-4	0.0042	14.7368	0.004	57.1429	0.0026	11.8182	59.0909		1.24696	0.997571	0.249393	4.83516	0.967033
Triclosan4	3380-34-5	0.067	235.088	0.033	471.429	0.047	213.636	1068.18		1.10041	0.880328	0.220082	2.20669	0.441337
1,2,4- & 1,3,5-Trimethylbenzene	95-63-6 and 108-67-8	0.14	491.228	0.14	2000	0.048	218.182	1090.91		2.25146	1.80117	0.450292	9.16667	1.83333
Tris (2-chloroethyl) phosphate (TCEP)3,4	115-96-8	0.15	526.316	0.068	971.429	0.067	304.545	1522.73		1.7282	1.38256	0.34564	3.18977	0.637953
Venlafaxine	93413-69-5	0.0054	18.9474	0.0054	77.1429	0.0054	24.5455	122.727		0.77193	0.617544	0.154386	3.14286	0.628571
Xylenes4	1330-20-7	0.5	1754.39	0.15	2142.86	0.18	818.182	4090.91		2.14425	1.7154	0.42885	2.61905	0.52381
NA - Not Applicable
ND - Not Derived
1More detailed summary of the RfD derivation for each chemicals can be found on MDH's web site : http://www.health.state.mn.us/divs/eh/risk/guidance/gw/table.html									N=	63	63	63	63	63
2 Study type oral unless otherwise noted									Min	0.77193	0.617544	0.154386	1.63975	0.32795
3 Chemical also evaluated as a linear carcinogen									Max	33.0827	26.4662	6.61654	31.4286	6.28571
4 Chronic RfD based on chronic duration study, in the case of cadmium this was a long-term epi study.								% Ratios <1.0		0.190476	0.253968	0.761905	0	0.460317
